# Supplementary material
Source: PubMed Central journal article supplement (PMC7527942)

## Supplementary Online Content

Vos EL, Salo-Mullen EE, Tang LH, et al. Indications for total gastrectomy in *CDH1* mutation carriers and outcomes of 101 risk-reducing minimally invasive and open gastrectomies. *JAMA Surg*. Published online September 30, 2020.  
doi:10.1001/jamasurg.2020.3356

**eFigure.** Signet Ring Cell Carcinoma (SRCC) Findings in 101 Asymptomatic Patients With *CDH1* Variants Who Underwent Total Gastrectomy at MSK Based on Variant Pathogenicity and Family History of Gastric Cancer (GC)

This supplementary material has been provided by the authors to give readers additional information about their work.

**eFigure 1. Signet ring cell carcinoma (SRCC) findings in 101 asymptomatic patients with *CDH1* P/LP variants who underwent total gastrectomy at MSK based on variant pathogenicity and family history of gastric cancer (GC). P, pathogenic; LP, likely pathogenic; EGD, esophagogastroduodenoscopy.**

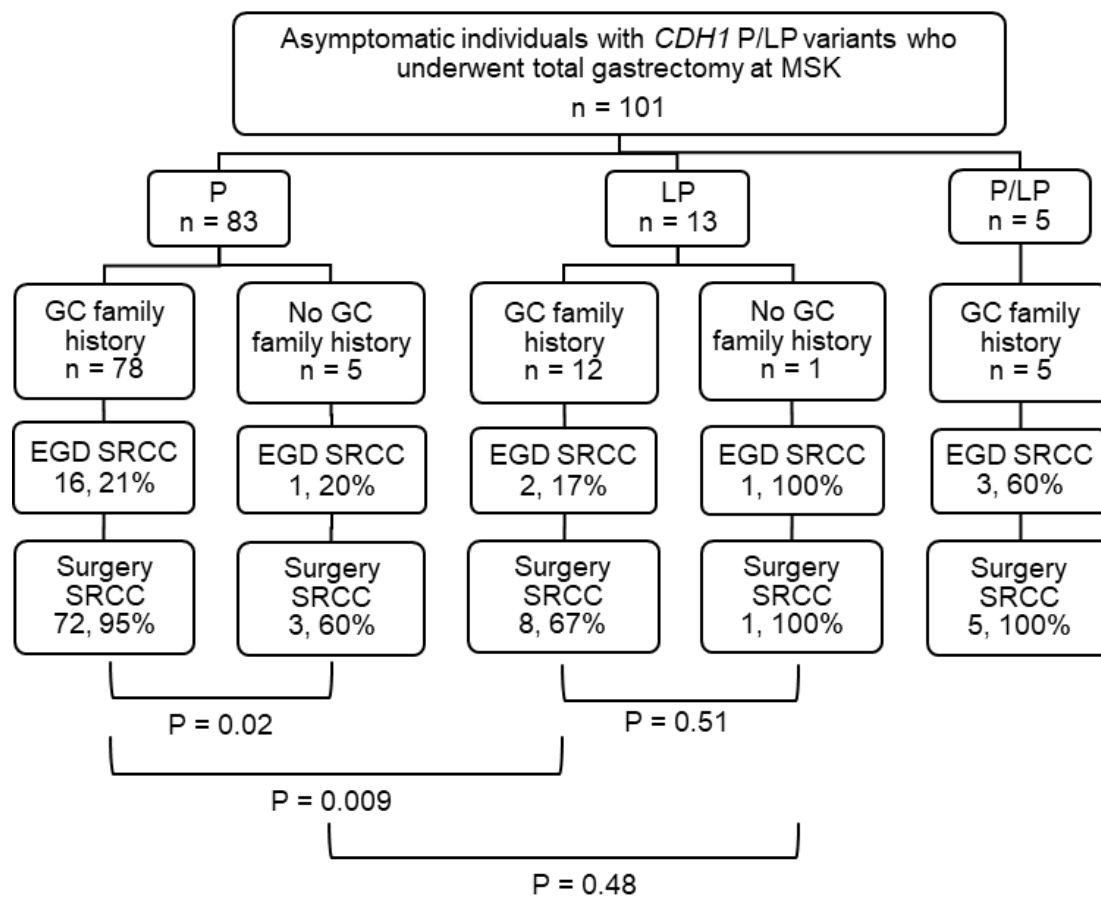

Supplement: jamasurg-e203356-s001.pdf [file jamasurg-e203356-s001.pdf]
